# Supplementary material
Source: Springer Nature journal article supplement (https://www.springermedizin.de/resource/supplementary/12985_2013_2512_MOESM3_ESM.pdf/9606902)

**(a)**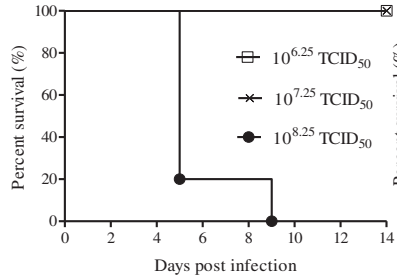**(b)**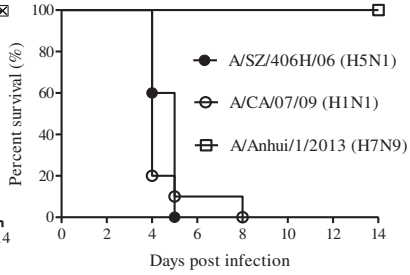**(c)**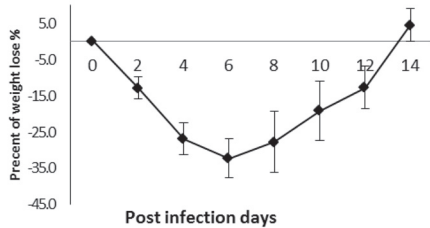

Supplement: MOESM3 [file 9606902]
